# Supplementary material for: Type III TGF-Î² receptor promotes FGF2-mediated neuronal differentiation in neuroblastoma
Source: JCI journal article supplement (doi:10.1172/jci69657), 2013-10-14
Supplement: sd1 [file 1]

**Supplemental Data:**

**Supplemental Figure 1:**

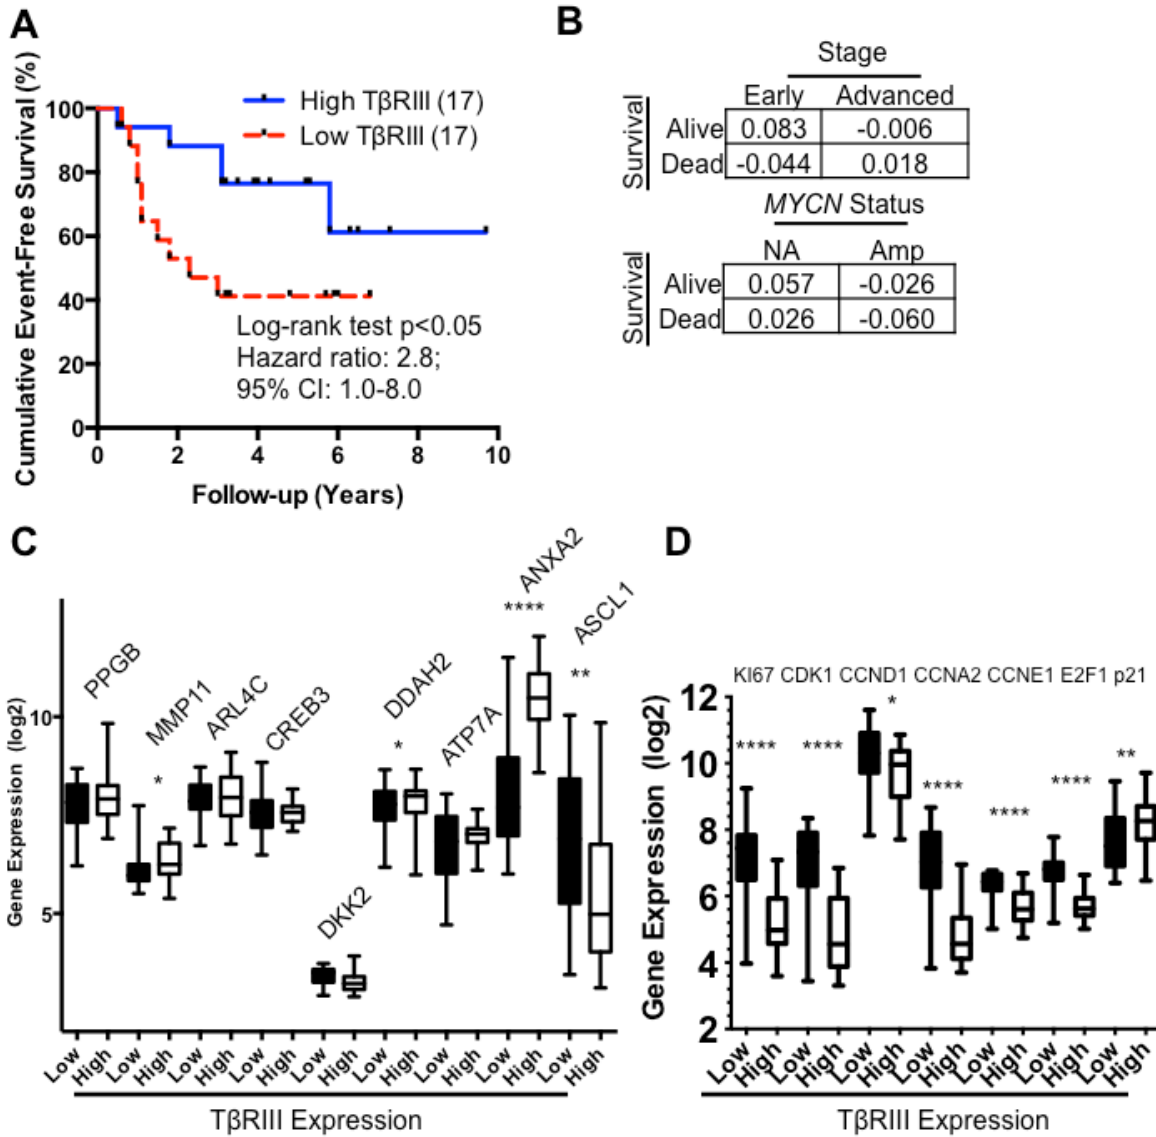

**Supplemental Fig. 1: Neuroblastoma microarray dataset analysis.** **(A)** Analysis of event-free survival in low (bottom 30%; red) and high (top 30%; blue) T $\beta$ R111-expressing NB using oncogenomics software and the neuroblastoma prognosis dataset. **(B)** Tables of T $\beta$ R111 expression from the Oberthur dataset. **(C)** Microarray meta-dataset expression of differentiation markers identified by Hahn et al in low T $\beta$ R111 (bottom 10%) vs. high T $\beta$ R111 (top 10%) NB. ASCL1 represents a negative marker of differentiation. Data are presented as median and inter-quartile range. Mann Whitney test: \* $p < 0.05$ , \*\* $p < 0.01$ , \*\*\*\* $p < 0.0001$ . **(D)** Microarray meta-dataset expression of cell-cycle genes in low T $\beta$ R111 (bottom 10%) vs. high T $\beta$ R111 (top 10%) NB (median and inter-quartile range). Mann-Whitney test: \* $p < 0.05$ , \*\* $p < 0.01$ , \*\*\*\* $p < 0.0001$ .

**Supplemental Figure 2:**

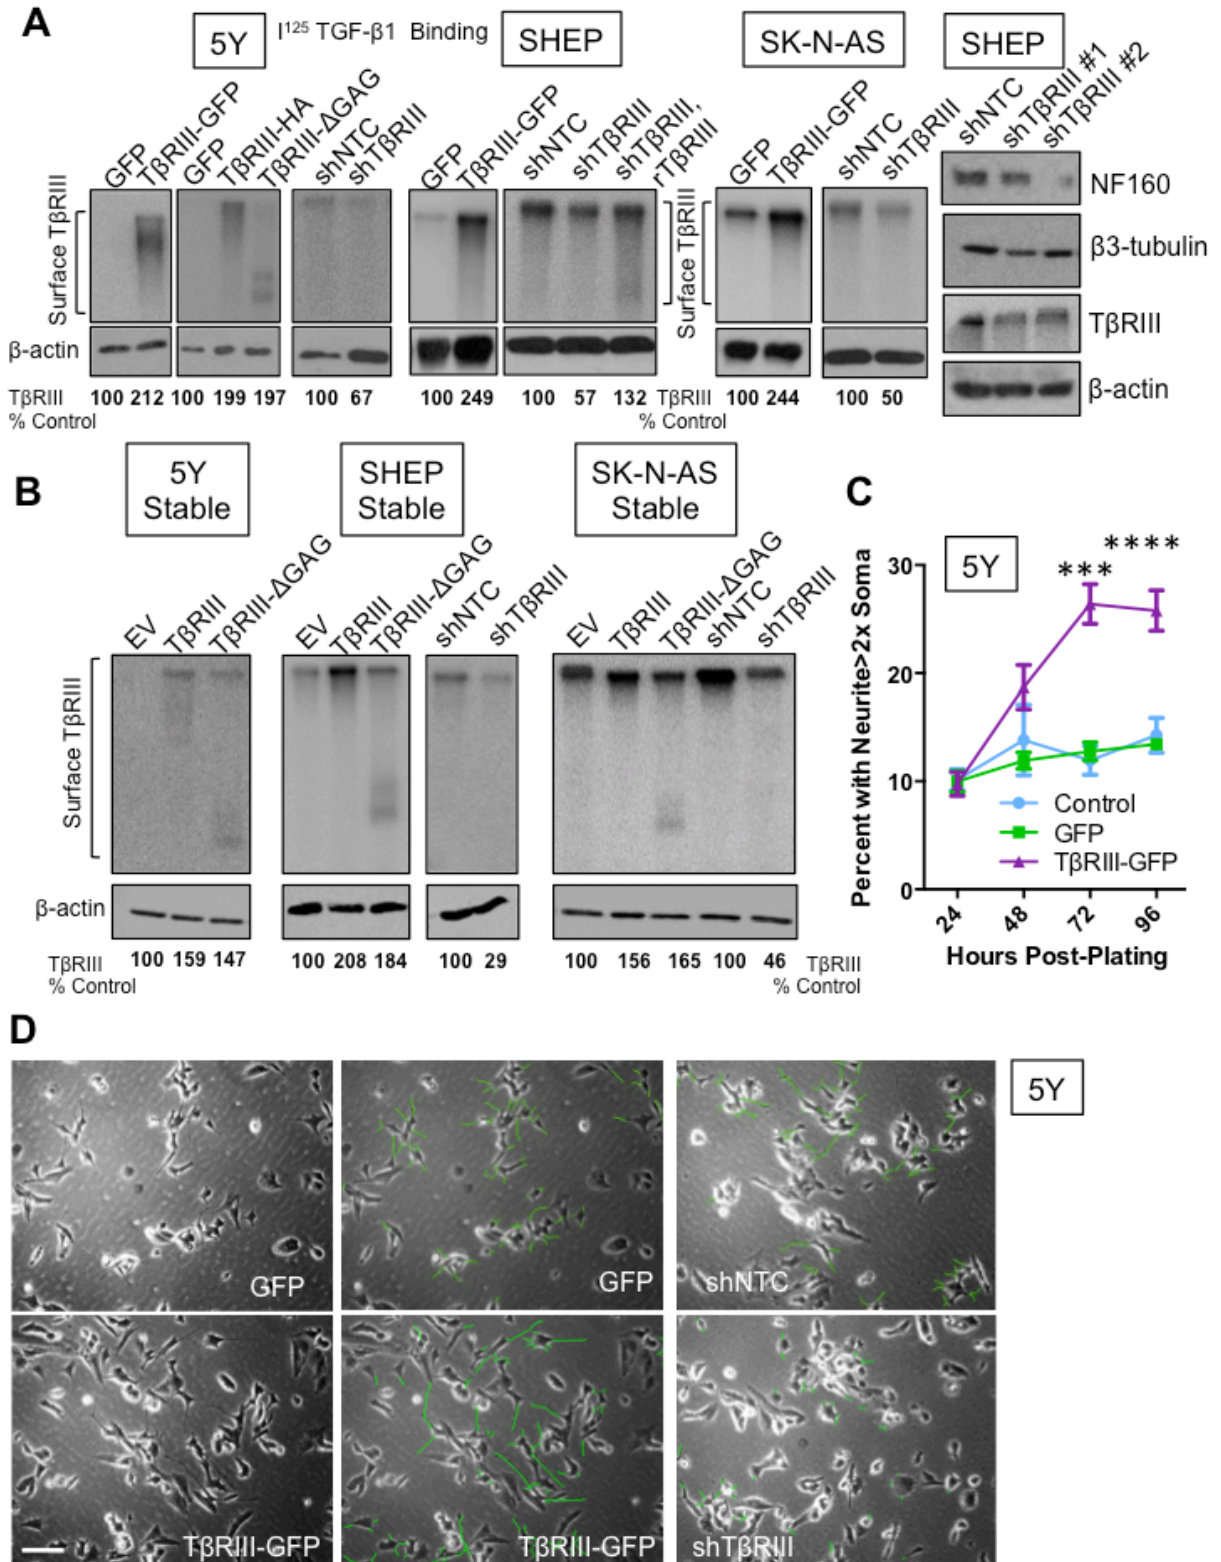

**Supplemental Fig. 2: T $\beta$ R111 expression promotes neuritogenesis and neuronal**

**differentiation. (A)** I<sup>125</sup> TGF- $\beta$  binding and crosslinking with T $\beta$ R111 pull-down in 5Y, SHEP and SK-N-AS transduced with T $\beta$ R111 and shRNA adenoviral constructs. Densitometry for T $\beta$ R111 normalized to  $\beta$ -actin. **(B)** I<sup>125</sup> TGF- $\beta$  binding and crosslinking with T $\beta$ R111 pull-down in lentivirus-generated antibiotic-selected stable cell lines. Densitometry for T $\beta$ R111 normalized to  $\beta$ -actin. **(C)** Neurite quantification over time in adenovirus-transduced 5Y by counting cells with at least one neurite greater than twice the length of the cell body (soma). Data are presented as mean of three fields  $\pm$  SEM. Two-way ANOVA  $p < 0.0001$  for main effects of time and receptor expression; interaction  $p < 0.001$ ; Bonferonni post-hoc comparisons to control: \*\*\* $p < 0.001$  \*\*\*\* $p < 0.0001$ . **(D)** Phase contrast microscopy of 5Y after 48 hours of adenoviral transduction with neurites traced in green using NeuronJ in the middle and far right panels. 10x objective; scale bar=100 $\mu$ M.



**Supplemental Figure 3:**

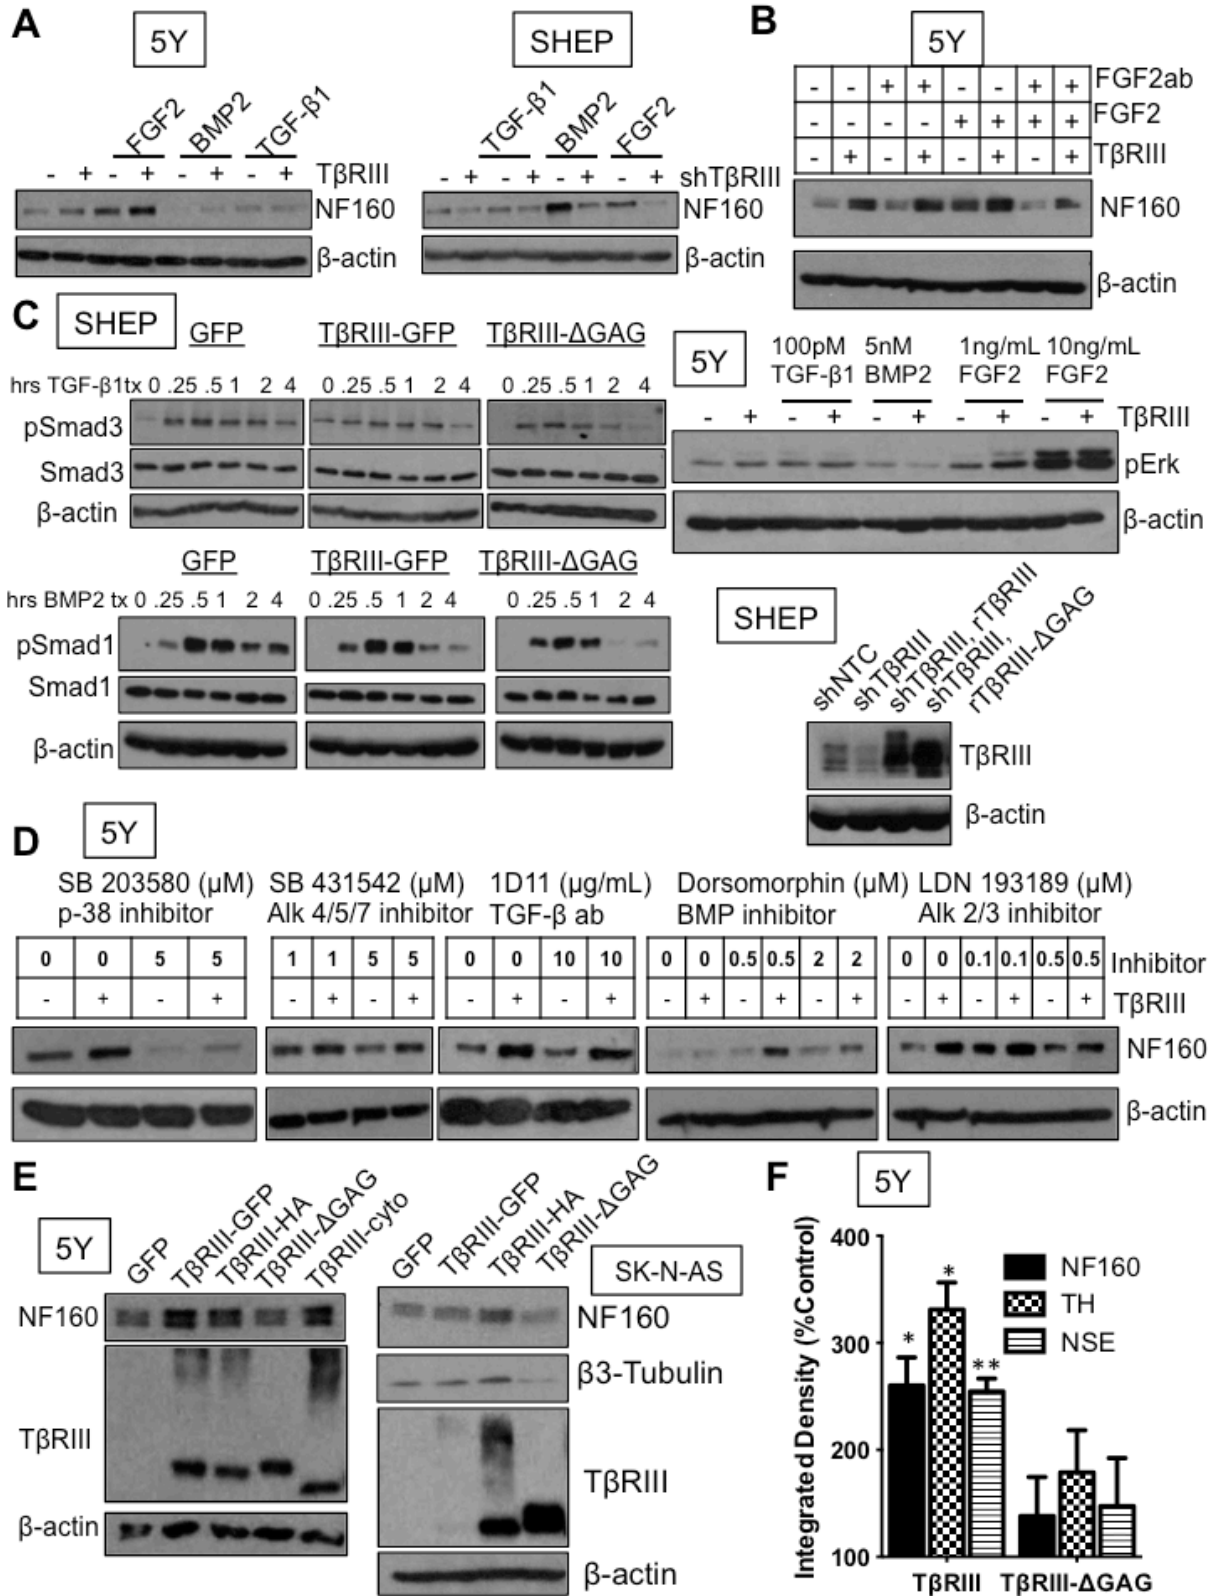

**Supplemental Fig. 3: The differentiating effects of T $\beta$ RIII are not via canonical TGF- $\beta$** 

**signaling. (A)** Western blot for NF160 after 72 hour plating and ligand treatment (10ng/mL FGF2, 5nM BMP2, 100pM TGF- $\beta$ 1). 5Y were transduced with T $\beta$ RIII-GFP (+) or GFP control (-). SHEP were transduced with shT $\beta$ RIII (+) or non-targeted control shRNA (-). **(B)** Western blot for NF160 after 72 hour plating, transduction, and ligand treatment (1ng/mL FGF2, 5 $\mu$ g/mL FGF2 neutralizing antibody). **(C)** Western blot for phosphorylated and total SMAD1 and SMAD3 in SHEP after 72 hour transduction and treatment with 20 pM TGF- $\beta$ 1 or 10 nM BMP2 for the times indicated. Western blot for phosphorylated erk after 96 hrs of adenoviral transduction with T $\beta$ RIII or GFP control and treatment with TGF- $\beta$ 1 (100pM), BMP2 (5nM) or FGF2 at the concentrations shown. T $\beta$ RIII western in SHEP after 72 hr knockdown and rescue with shRNA resistant rodent T $\beta$ RIII constructs (rT $\beta$ RIII, rT $\beta$ RIII- $\Delta$ GAG). **(D)** Western blot for NF160 in 5Y transduced with T $\beta$ RIII-GFP or GFP control for 72 hours and treated with various signaling inhibitors at the concentrations shown. **(E)** Western blot for differentiation markers in 5Y and SK-N-AS transduced with T $\beta$ RIII constructs or GFP control for 96 hours. **(F)** 5Y transiently transduced with T $\beta$ RIII-GFP, T $\beta$ RIII- $\Delta$ GAG, or GFP control for 96 hours. Quantification of differentiation markers from three independent experiments normalized to  $\beta$ -actin, presented as mean percent GFP control  $\pm$  SEM. One-sample t-test \* $p$ <0.05 \*\* $p$ <0.01.

Supplemental Figure 4:

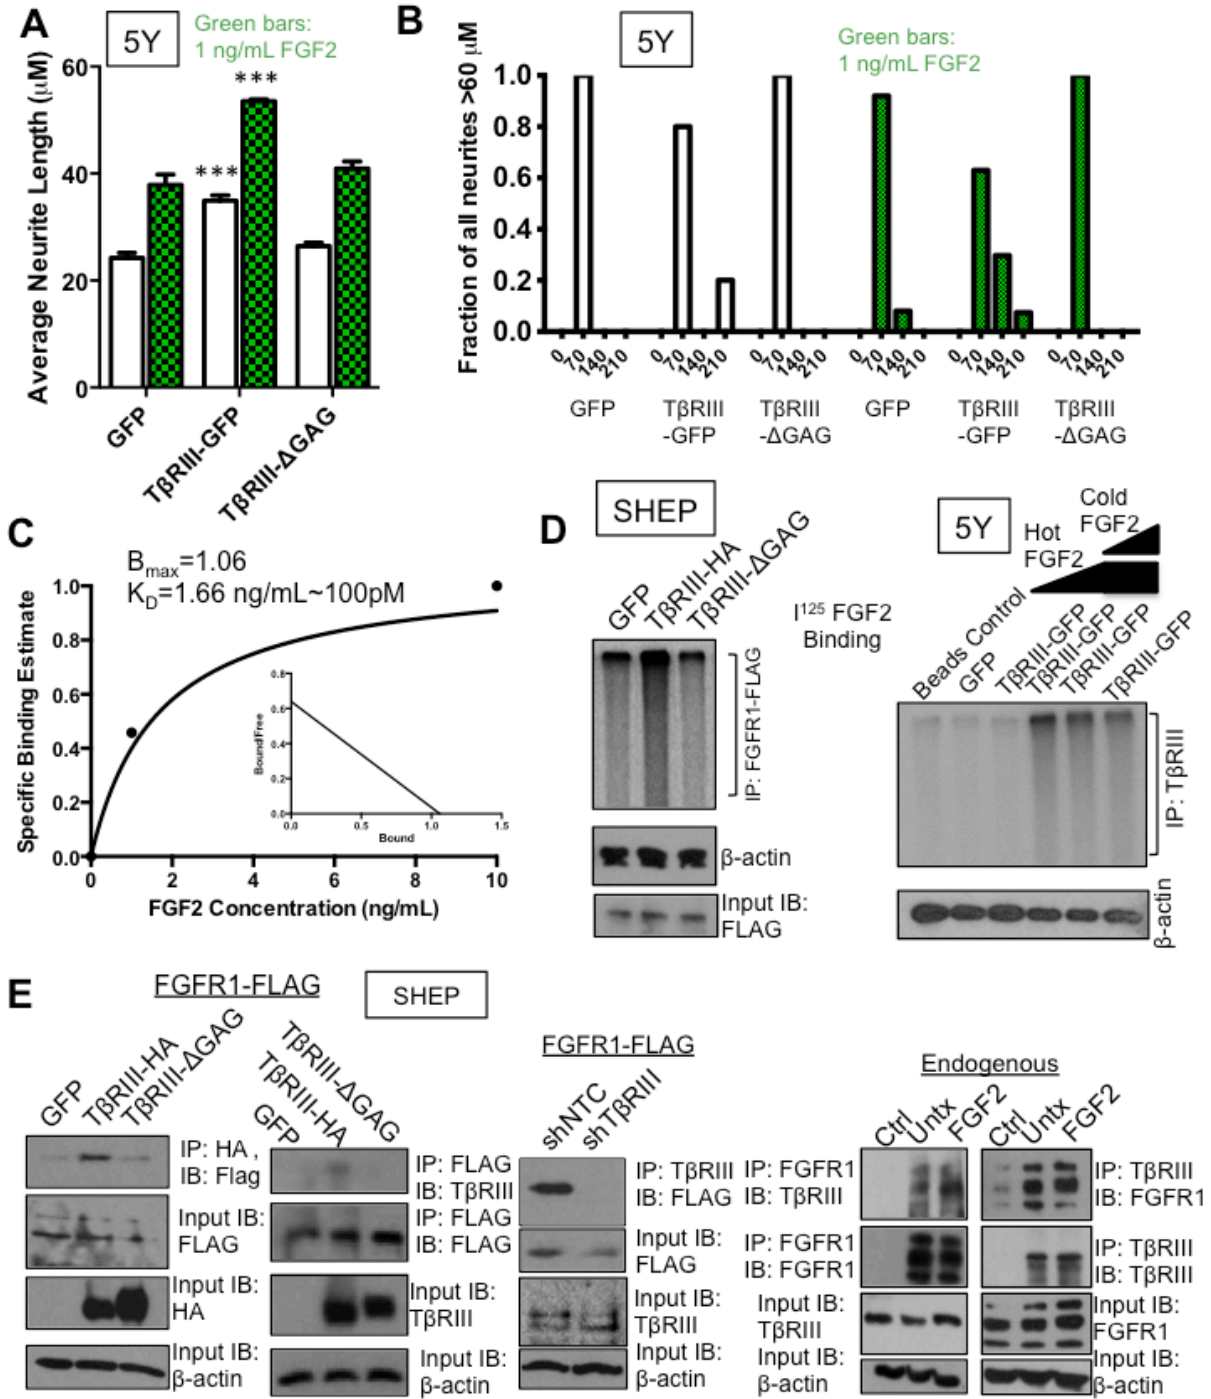

**Supplemental Fig. 4: T $\beta$ RIII enhances neuronal differentiation and FGF2-induced neurite outgrowth.** **(A)** 5Y transiently transduced with T $\beta$ RIII-GFP, T $\beta$ RIII- $\Delta$ GAG, or GFP control and treated with FGF2 (1 ng/mL) for 48 hrs. Data are presented as mean neurite length from three fields  $\pm$  SEM. One-way ANOVA for treated (green bars) and untreated  $p < 0.0001$ . Bonferroni post-hoc compared to control and T $\beta$ RIII- $\Delta$ GAG: \*\*\* $p < 0.001$ . **(B)** Fraction of neurites greater than 2x average soma length (60  $\mu$ M), sorted into bins centered on length indicated on x-axis. **(C)** Scatchard analysis of I<sup>125</sup> FGF2 binding dose-course data using densitometry for relative binding ratios and assuming 100% binding at 10ng/mL. **(D)** I<sup>125</sup> FGF2 binding and crosslinking with FGFR1-FLAG pull-down. **(E)** Co-immunoprecipitation of T $\beta$ RIII-HA and FGFR1-FLAG in SHEP with confirmation of equal FLAG pulldown (panels 1 and 2). Co-immunoprecipitation of T $\beta$ RIII and FGFR1-FLAG in SHEP with endogenous T $\beta$ RIII or shRNA knockdown (panel 3). Co-immunoprecipitation of endogenous T $\beta$ RIII and FGFR1 in SHEP (IP: FGFR1 in panel 4 and IP T $\beta$ RIII in panel 5). FGF2 treatment: 10ng/mL, 15 min.

**Supplemental Figure 5:**

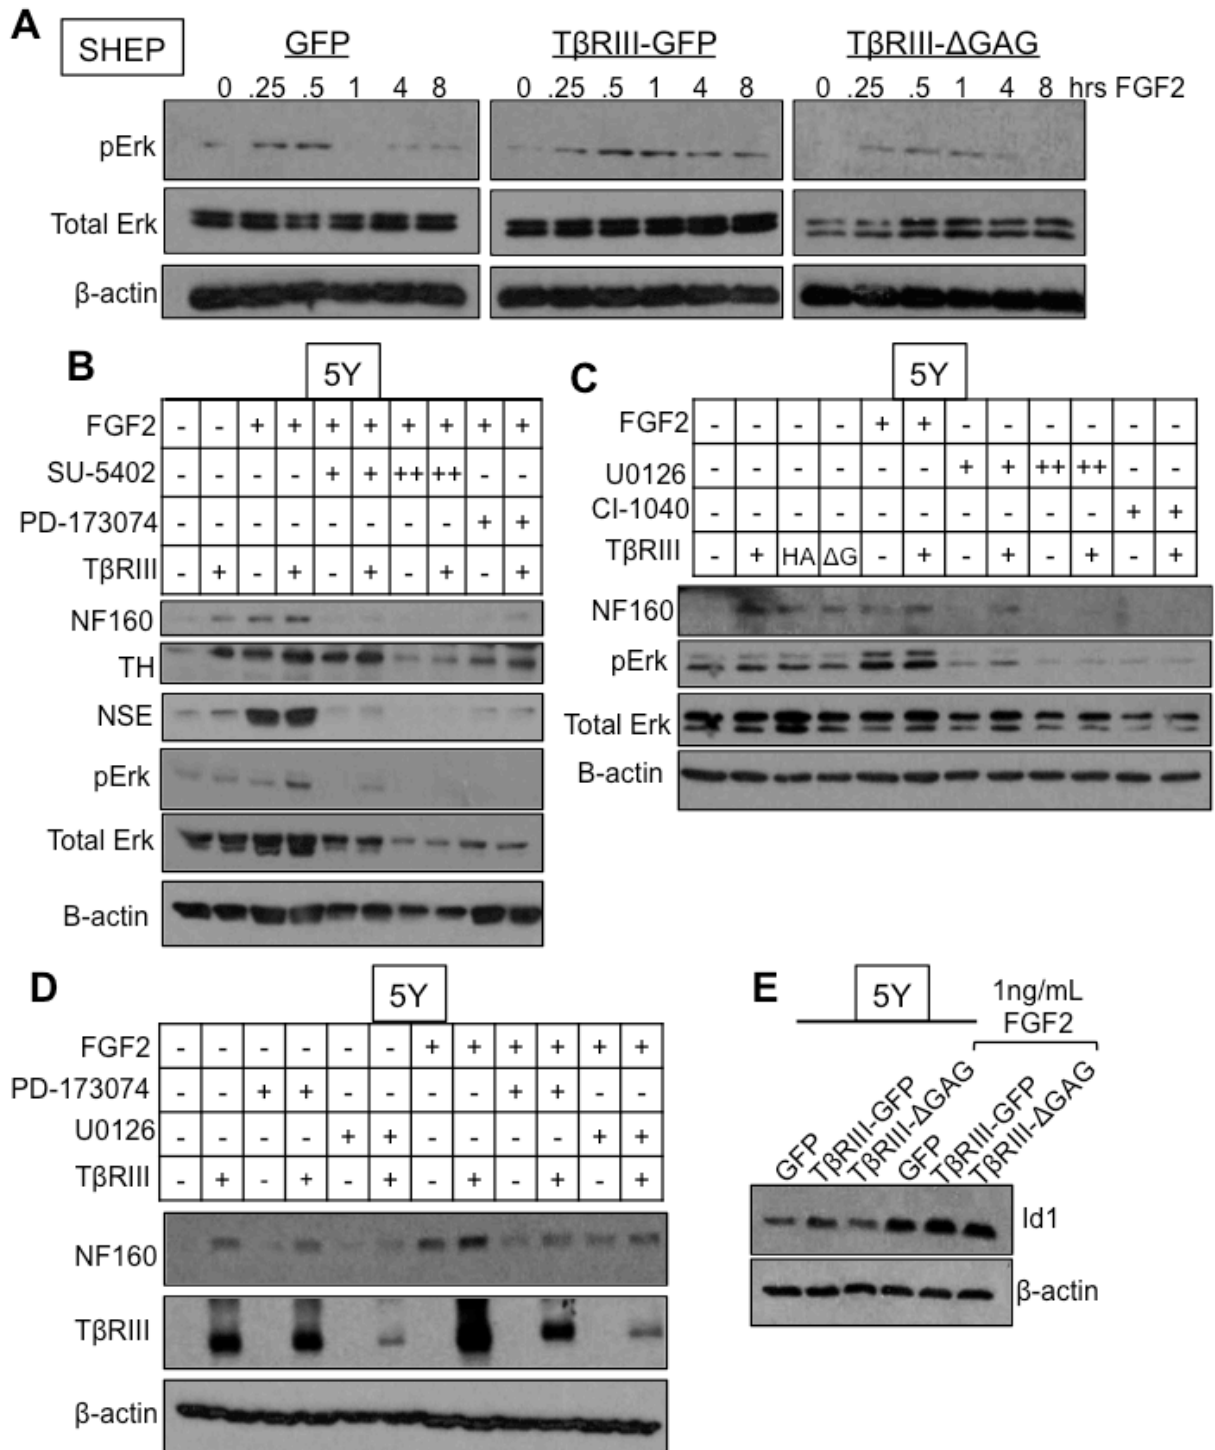

**Supplemental Fig. 5: T $\beta$ R111 enhances FGF2 signaling via Id1 to promote neuronal differentiation.** **(A)** Western blot in SHEP for phosphorylated (pErk) and total Erk after 72 hours of transduction, 60 hours of serum starvation and treatment with 10ng/mL FGF2 for the indicated times. **(B)** Western blots for differentiation markers and Erk signaling following 96 hours of transduction and treatment with FGF2 (10ng/mL), as well as the FGFR inhibitors SU-5402 (10 $\mu$ M, 20 $\mu$ M) and PD-173074 (1  $\mu$ M). **(C)** Western blots for Erk signaling and the differentiation marker NF160 following 96 hours of transduction and treatment with FGF2 (10ng/mL), as well as the Erk inhibitors U0126 (1 $\mu$ M, 10 $\mu$ M) and CI-1040 (1  $\mu$ M). **(D)** Western blot for NF160 following 96 hours of transduction and treatment with FGF2 (10ng/mL), PD-173074 (1  $\mu$ M), and U0126 (10 $\mu$ M). **(E)** Western blot for Id1 in 5Y transduced for 96 hours and treated with FGF2 (1ng/mL).

**Supplemental Figure 6:**

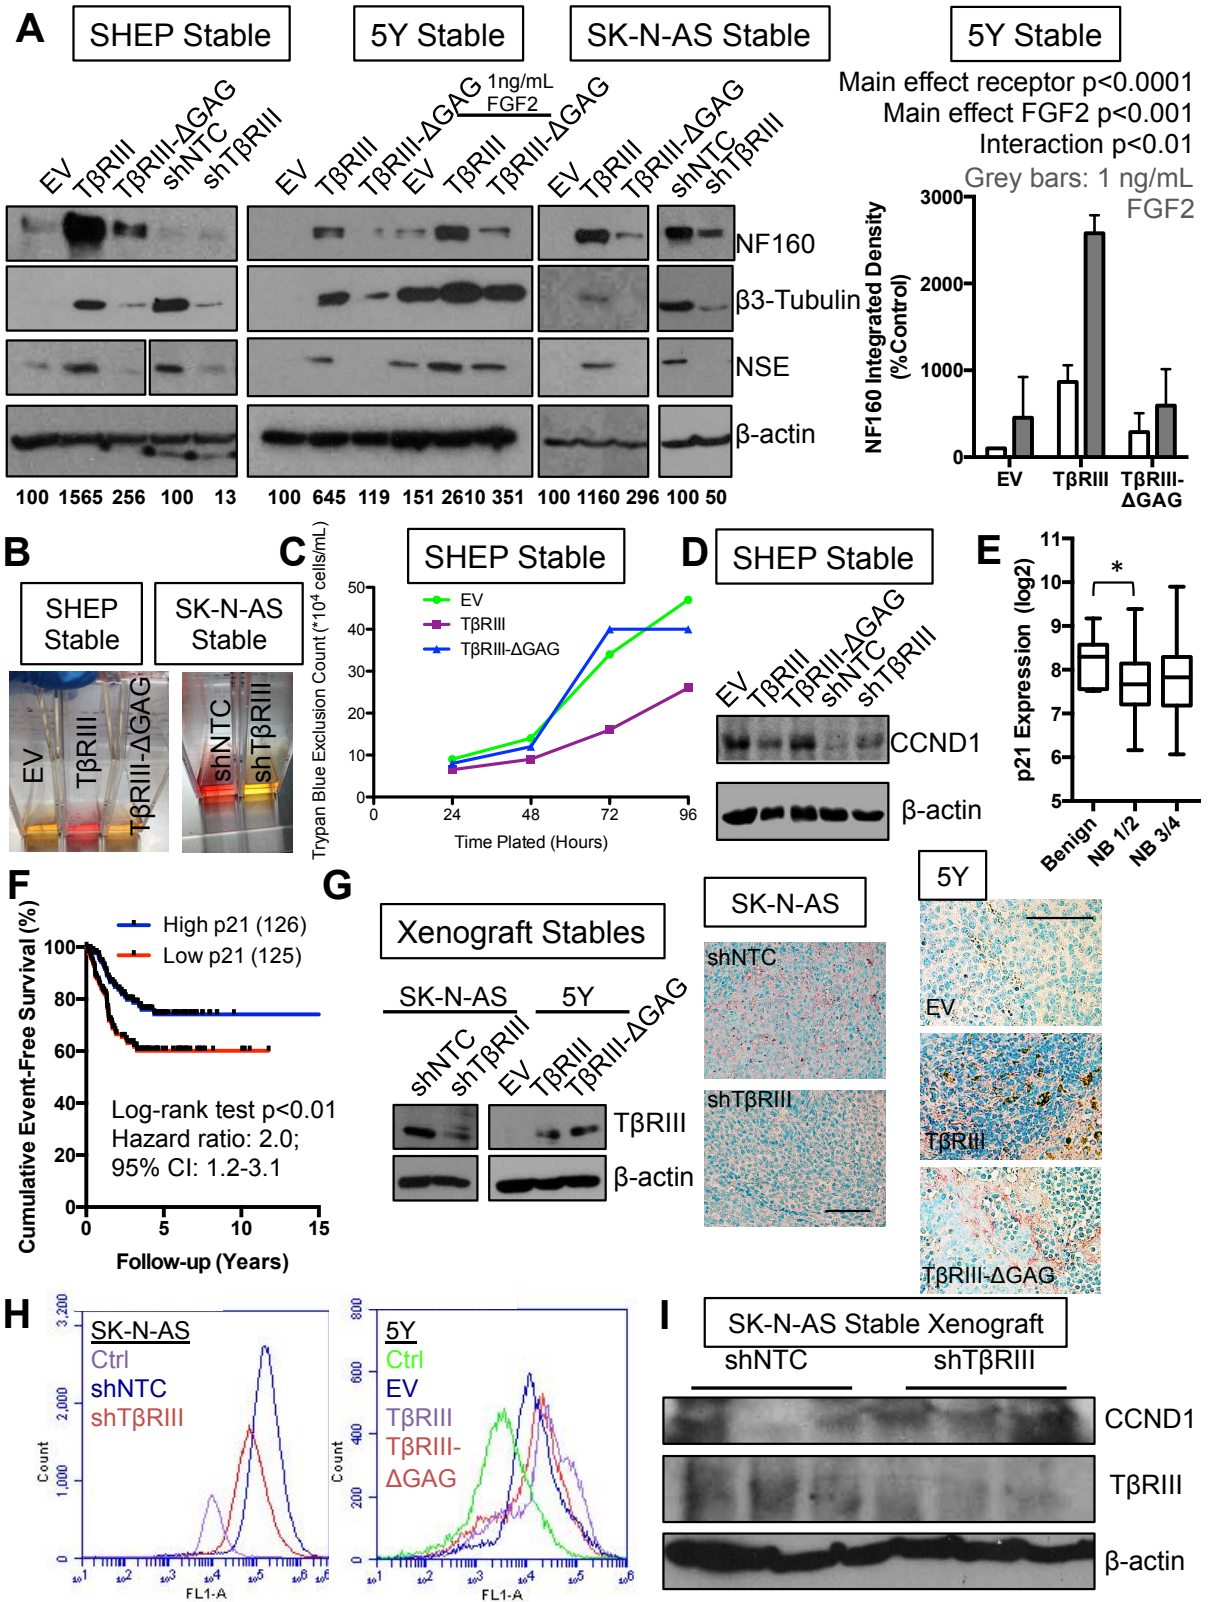

**Supplemental Fig.6: T $\beta$ R111 promotes differentiation to decrease proliferation in NB**

**stable cell lines and xenografts. (A)** Western blot for differentiation markers in stable cell lines. FGF2 treatment (1ng/mL) for 72 hours. Densitometric analysis for  $\beta$ 3-Tubulin (SHEP) and NF160 (5Y and SK-N-AS) normalized to  $\beta$ -actin. Quantification of three independent western blots for NF160 in 5Y stable cell lines treated for 72 hours with FGF2 (1ng/mL). Data are presented as mean  $\pm$  SEM. Two-way ANOVA shown. **(B)** Photograph of stable SHEP and SK-N-AS cell lines plated equally in flasks and grown for 3 days to exhibit media acidification (yellow color). **(C)** Trypan exclusion counting of SHEP stable cells. **(D)** Western blot for cyclin D1 (CCND1) in SHEP stable cells. **(E)** p21 expression in the microarray meta-dataset by stage of disease. Data are presented as median and inter-quartile range. Kruskal-Wallis:  $p < 0.05$ . Inter-group comparisons (Mann-Whitney):  $*p < 0.05$ . **(F)** Analysis of event-free survival in low (bottom 50%; red) and high (top 50%; blue) p21-expressing NB using oncogenomics software and the Oberthur dataset. **(G)** Western blot confirmation of T $\beta$ R111 expression in stable cell lines immediately prior to xenograft implantation. IHC confirmation of T $\beta$ R111 knockdown and overexpression in sections of tumors from animals sacrificed at 4 weeks (SK-N-AS) or 7 weeks (5Y); scale bar=50 $\mu$ M. **(H)** T $\beta$ R111 flow cytometry in SK-N-AS and 5Y stable cell lines. Secondary antibody alone used as control. **(I)** Western blot for cyclin D1 (CCND1) in lysates from SK-N-AS xenografts at 4 weeks.



**Supplemental Table 1:**

| Gene     | TβRIII    | N-Myc       | SOX-10      | Id1         | KI67        | CDK1        | CCND1       | CCNA2       | CCNE1       | E2F1        |
|----------|-----------|-------------|-------------|-------------|-------------|-------------|-------------|-------------|-------------|-------------|
| Probe ID | 204731_at | 209757_s_at | 209843_s_at | 208937_s_at | 212022_s_at | 210559_s_at | 208712_at   | 203418_at   | 213523_at   | 2028_s_at   |
| Gene     | PPGB      | MMP11       | ARL4C       | CREB3       | DKK2        | DDAH2       | ATP7A       | ANXA2       | ASCL1       | p21         |
| Probe ID | 200661_at | 203878_s_at | 202208_s_at | 209432_s_at | 224199_at   | 202262_x_at | 205198_s_at | 210427_x_at | 209988_s_at | 202284_s_at |

**Supplemental Table 1: Affymetrix probe list.** All affymetrix probes listed are from the HG-U133 Plus 2.0 platform.

**Supplemental Table 2:**

| Adrenal<br>Macro<br>4 wk | Adrenal<br>Micro<br>4 wk | Adrenal<br>Micro<br>End | Lung<br>Micro<br>4 wk | Lung<br>Micro<br>End |                  |
|--------------------------|--------------------------|-------------------------|-----------------------|----------------------|------------------|
| 0/3                      | 0/3                      | 4/5                     | 0/3                   | 1/5                  | shNTC            |
| 2/3                      | 3/3                      | 5/5                     | 1/3                   | 5/5                  | shT $\beta$ R111 |

**Supplemental Table 2: T $\beta$ R111 expression suppresses xenograft metastasis.** Tabulation of results for metastasis in a cohort from the SK-N-AS xenograft model at 4 weeks and survival to humane endpoints (denoted End in the table).
